# Supplementary material for: Analysis of the growth and physicochemical properties of the newly developed stilbazolium derivative 4-N,N-dimethylamino-4-N-methyl stilbazolium 2-formyl benzene sulfonate (DSFS) single crystal: an effective material for nonlinear optical applications
Source: Royal Society of Chemistry journal article supplement (doi:10.1039/d2ra05302k), 2022-01-01
Supplement: d2ra05302k1.pdf [file d2ra05302k1.pdf]

**Table 1: Bond angles of DSFS crystal**

| Atoms             | Angles (°) |
|-------------------|------------|
| C(1)-C(2)-C(3)    | 120.5(2)   |
| C(11)-C(12)-C(13) | 121.3(2)   |
| C(11)-C(12)-H(12) | 119.3      |
| C(11)-N(2)-C(15)  | 120.6(2)   |
| C(11)-N(2)-C(16)  | 119.9(2)   |
| C(12)-C(13)-H(13) | 119        |
| C(15)-N(2)-C(16)  | 117.9(2)   |
| C(2)-C(1)-C(5)    | 115.5(2)   |
| C(2)-C(1)-C(6)    | 119.5(2)   |
| C(2)-C(1)-C(6)    | 119.9(2)   |
| C(2)-C(3)-C(4)    | 120.5(2)   |
| C(2)-C(3)-H(3)    | 119.7      |
| C(2)-C(3)-H(3)    | 119.5      |
| C(3)-C(4)-C(5)    | 119.5(2)   |
| C(3)-C(4)-H(4)    | 120.3      |
| C(3)-N(1)-C(14)   | 120.5(2)   |
| C(3)-N(1)-C(4)    | 119.3(2)   |
| C(4)-C(5)-C(6)    | 121.3(2)   |
| C(4)-C(5)-H(5)    | 119.3      |
| C(4)-C(5)-H(5)    | 119.5      |
| C(4)-N(1)-C(14)   | 120.1(2)   |
| C(5)-C(1)-C(6)    | 124.6(2)   |
| C(5)-C(6)-C(7)    | 118.8(2)   |
| C(6)-C(7)-C(8)    | 127.4(2)   |
| C(6)-C(7)-H(7)    | 118.1      |
| C(6)-C(7)-H(7)    | 116.3      |

| C(7)-C(8)-C(13)     | 123.5(2)   |
|---------------------|------------|
| Atoms               | Angles (°) |
| C(7)-C(8)-C(9)      | 120.1(2)   |
| C(8)-C(13)-C(12)    | 122.0(2)   |
| C(8)-C(13)-H(13)    | 119        |
| C(8)-C(9)-C(10)     | 122.7(2)   |
| C(8)-C(9)-H(9)      | 118.7      |
| C(9)-C(10)-C(11)    | 121.0(2)   |
| C(9)-C(10)-H(10)    | 119.5      |
| C(9)-C(8)-C(13)     | 116.3(2)   |
| H(10)-C(10)-C(11)   | 119.5      |
| H(12)-C(12)-C(13)   | 119.3      |
| H(14A)-C(14)-H(14B) | 109.5      |
| H(14A)-C(14)-H(14C) | 109.5      |
| H(14B)-C(14)-H(14C) | 109.4      |
| H(15A)-C(15)-H(15B) | 109.5      |
| H(15A)-C(15)-H(15C) | 109.5      |
| H(15B)-C(15)-H(15C) | 109.4      |
| H(16A)-C(16)-H(16B) | 109.5      |
| H(16A)-C(16)-H(16C) | 109.5      |
| H(16B)-C(16)-H(16C) | 109.5      |
| H(2)-C(2)-C(3)      | 119.3      |
| H(2)-C(2)-C(3)      | 119.3      |
| H(3)-C(3)-C(4)      | 119.8      |
| H(4)-C(4)-C(5)      | 120.3      |
| H(4)-C(4)-C(5)      | 119.2      |
| H(5)-C(5)-C(6)      | 119.4      |
| H(6)-C(6)-C(7)      | 117.3      |

| H(7)-C(7)-C(8)    | 116.3      |
|-------------------|------------|
| Atoms             | Angles (°) |
| H(9)-C(9)-C(10)   | 118.7      |
| N(1)-C(14)-H(14A) | 109.5      |
| N(1)-C(14)-H(14B) | 109.5      |
| N(1)-C(14)-H(14C) | 109.5      |
| N(1)-C(3)-C(2)    | 121.1(2)   |
| N(1)-C(3)-H(3)    | 119.5      |
| N(1)-C(4)-C(5)    | 121.5(2)   |
| N(1)-C(4)-H(4)    | 119.3      |
| N(2)-C(11)-C(10)  | 122.1(2)   |
| N(2)-C(11)-C(12)  | 121.2(2)   |
| N(2)-C(15)-H(15A) | 109.5      |
| N(2)-C(15)-H(15B) | 109.5      |
| N(2)-C(15)-H(15C) | 109.5      |
| N(2)-C(16)-H(16A) | 109.4      |
| N(2)-C(16)-H(16B) | 109.5      |
| N(2)-C(16)-H(16C) | 109.5      |
| O(1)-S(1)-C(1)    | 105.33(8)  |
| O(1)-S(1)-O(3)    | 114.06(9)  |
| O(1)-S(1)-O(4)    | 113.10(9)  |
| O(2)-C(7)-C(6)    | 123.8(2)   |
| O(2)-C(7)-H(7)    | 118.1      |
| O(3)-S(1)-C(1)    | 105.01(9)  |
| O(3)-S(1)-O(4)    | 113.03(9)  |
| O(4)-S(1)-C(1)    | 105.21(8)  |
| S(1)-C(1)-C(2)    | 118.3(1)   |
| S(1)-C(1)-C(6)    | 122.2(1)   |

**Table 2. Bond length of DSFS**

| Atoms      | Length(Å) |
|------------|-----------|
| S(1)-O(1)  | 1.443(1)  |
| S(1)-O(3)  | 1.443(1)  |
| S(1)-O(4)  | 1.443(2)  |
| S(1)-C(1)  | 1.790(2)  |
| O(2)-C(7)  | 1.182(3)  |
| C(1)-C(2)  | 1.384(2)  |
| C(1)-C(6)  | 1.397(2)  |
| C(2)-H(2)  | 0.93      |
| C(2)-C(3)  | 1.380(2)  |
| C(3)-H(3)  | 0.93      |
| C(3)-C(4)  | 1.373(3)  |
| C(4)-H(4)  | 0.93      |
| C(4)-C(5)  | 1.375(3)  |
| C(5)-H(5)  | 0.93      |
| C(5)-C(6)  | 1.396(2)  |
| C(6)-C(7)  | 1.484(3)  |
| C(7)-H(7)  | 0.93      |
| N(1)-C(3)  | 1.337(3)  |
| N(1)-C(4)  | 1.339(3)  |
| N(1)-C(14) | 1.478(3)  |
| N(2)-C(11) | 1.370(3)  |
| N(2)-C(15) | 1.437(3)  |
| N(2)-C(16) | 1.452(3)  |
| C(1)-C(2)  | 1.392(3)  |
| C(1)-C(5)  | 1.392(3)  |
| C(1)-C(6)  | 1.449(3)  |
| C(2)-H(2)  | 0.93      |
| C(2)-C(3)  | 1.363(3)  |
| C(3)-H(3)  | 0.93      |
| C(4)-H(4)  | 0.93      |
| C(4)-C(5)  | 1.361(3)  |
| C(5)-H(5)  | 0.93      |
| C(6)-H(6)  | 0.93      |
| C(6)-C(7)  | 1.333(3)  |
| C(7)-H(7)  | 0.93      |
| C(7)-C(8)  | 1.451(3)  |
| C(8)-C(9)  | 1.387(3)  |
| C(8)-C(13) | 1.393(3)  |

| Atoms        | Length(Å) |
|--------------|-----------|
| C(9)-H(9)    | 0.93      |
| C(9)-C(10)   | 1.371(3)  |
| C(10)-H(10)  | 0.93      |
| C(10)-C(11)  | 1.396(3)  |
| C(11)-C(12)  | 1.406(3)  |
| C(12)-H(12)  | 0.93      |
| C(12)-C(13)  | 1.371(3)  |
| C(13)-H(13)  | 0.93      |
| C(14)-H(14A) | 0.96      |
| C(14)-H(14B) | 0.96      |
| C(14)-H(14C) | 0.96      |
| C(15)-H(15A) | 0.96      |
| C(15)-H(15B) | 0.96      |
| C(15)-H(15C) | 0.96      |
| C(16)-H(16A) | 0.96      |
| C(16)-H(16B) | 0.96      |
| C(16)-H(16C) | 0.96      |
